# Supplementary material for: Characteristics and Injury Patterns of Road Traffic Injuries in Urban and Rural Uganda—A Retrospective Medical Record Review Study in Two Hospitals
Source: MDPI journal article supplement (doi:10.3390/ijerph18147663), 2021-07-19
Supplement: s1 [file s1]

Figure S1: Interface for data collection and during the on-site Medical Record Review

# Characteristics and injury patterns of road traffic injuries in two hospitals in urban and rural Uganda in 2016

|                                               |                                                                                    |
|-----------------------------------------------|------------------------------------------------------------------------------------|
| ID                                            | <input type="text"/>                                                               |
| Hospital [SFH / KMH]                          | <input type="text"/>                                                               |
| Patient identifier                            | <input type="text"/>                                                               |
| Admission Date [dd.mm.2016]                   | <input type="text"/>                                                               |
| Age [years]                                   | <input type="text"/>                                                               |
| Gender [m / f]                                | <input type="text"/>                                                               |
| Duration of hospital stay [days]              | <input type="text"/>                                                               |
| Trauma [yes / no]                             | <input type="text"/>                                                               |
| RTA [yes / no]                                | <input type="text"/>                                                               |
| Fatal outcome [yes / no]                      | <input type="text"/>                                                               |
| Mode of transport                             | <input type="text"/>                                                               |
| Road user                                     | <input type="text"/>                                                               |
| Accident counterpart                          | <input type="text"/>                                                               |
| Boda-Boda involved [yes / no]                 | <input type="checkbox"/>                                                           |
| Additional information on injuries            | <input type="text"/>                                                               |
| Additional information on severity (e.g. GCS) | <input type="text"/>                                                               |
| Remarks                                       | <input type="text"/>                                                               |
| Data collection finished                      | <input checked="" type="checkbox"/> Inconsistent - remove <input type="checkbox"/> |

  

|                           |                      |
|---------------------------|----------------------|
| Head injury [yes / no]    | <input type="text"/> |
| Head: type of injury 1    | <input type="text"/> |
| Head: type of injury 2    | <input type="text"/> |
| Head: type of injury 3    | <input type="text"/> |
| Face injury [yes / no]    | <input type="text"/> |
| Face: type of injury 1    | <input type="text"/> |
| Face: type of injury 2    | <input type="text"/> |
| Face: type of injury 3    | <input type="text"/> |
| Neck injury [yes / no]    | <input type="text"/> |
| Neck: type of injury 1    | <input type="text"/> |
| Neck: type of injury 2    | <input type="text"/> |
| Neck: type of injury 3    | <input type="text"/> |
| Spine injury [yes / no]   | <input type="text"/> |
| Spine: type of injury 1   | <input type="text"/> |
| Spine: type of injury 2   | <input type="text"/> |
| Spine: type of injury 3   | <input type="text"/> |
| Thorax injury [yes / no]  | <input type="text"/> |
| Thorax: type of injury 1  | <input type="text"/> |
| Thorax: type of injury 2  | <input type="text"/> |
| Thorax: type of injury 3  | <input type="text"/> |
| Abdomen injury [yes / no] | <input type="text"/> |
| Abdomen: type of injury 1 | <input type="text"/> |
| Abdomen: type of injury 2 | <input type="text"/> |
| Abdomen: type of injury 3 | <input type="text"/> |

  

|                             |                      |
|-----------------------------|----------------------|
| Upper arm injury [yes / no] | <input type="text"/> |
| Upper arm: type of injury 1 | <input type="text"/> |
| Upper arm: type of injury 2 | <input type="text"/> |
| Upper arm: type of injury 3 | <input type="text"/> |
| Lower arm injury [yes / no] | <input type="text"/> |
| Lower arm: type of injury 1 | <input type="text"/> |
| Lower arm: type of injury 2 | <input type="text"/> |
| Lower arm: type of injury 3 | <input type="text"/> |
| Hand injury [yes / no]      | <input type="text"/> |
| Hand: type of injury 1      | <input type="text"/> |
| Hand: type of injury 2      | <input type="text"/> |
| Hand: type of injury 3      | <input type="text"/> |
| Upper leg injury [yes / no] | <input type="text"/> |
| Upper leg: type of injury 1 | <input type="text"/> |
| Upper leg: type of injury 2 | <input type="text"/> |
| Upper leg: type of injury 3 | <input type="text"/> |
| Lower leg injury [yes / no] | <input type="text"/> |
| Lower leg: type of injury 1 | <input type="text"/> |
| Lower leg: type of injury 2 | <input type="text"/> |
| Lower leg: type of injury 3 | <input type="text"/> |
| Foot injury [yes / no]      | <input type="text"/> |
| Foot: type of injury 1      | <input type="text"/> |
| Foot: type of injury 2      | <input type="text"/> |
| Foot: type of injury 3      | <input type="text"/> |
| Other injury [yes / no]     | <input type="text"/> |
| Other: type of injury 1     | <input type="text"/> |
| Other: type of injury 2     | <input type="text"/> |
| Other: type of injury 3     | <input type="text"/> |

  

|                       |                      |
|-----------------------|----------------------|
| Injury Severity Score | <input type="text"/> |
|-----------------------|----------------------|

**Table S1:** Proportion of incomplete Medical Reviews for mode of transportation, road user and crash counterpart in the urban and rural hospital

| Data incomplete for:   | Urban Hospital 1 | Rural Hospital 2 |
|------------------------|------------------|------------------|
| Mode of transportation | 7.2%             | 47.6%            |
| Road user              | 9.2%             | 52.0%            |
| Crash counterpart      | 35.5%            | 72.1%            |

**Table S1:** Calculation of the Injury Severity Score (ISS) – adapted to MRR with limited information

| Injury location                                               | Injury type                                                                                                  | severity |
|---------------------------------------------------------------|--------------------------------------------------------------------------------------------------------------|----------|
| Head                                                          | Contusion without loss of consciousness (LOC) / “mild closed head injury (CHI)”                              | 1        |
| Head                                                          | Contusion with LOC < 15 min / un-displaced skull or facial bone fracture / “moderate CHI”                    | 2        |
| Head                                                          | Closed head injury (with radiological evidence) / displaced closed skull fracture without LOC / “severe CHI” | 3        |
| Head                                                          | Open head injury with (radiological) signs of intracranial injury                                            | 4        |
| Head                                                          | Bleeding / oedema / pneumocranium / raised intracranial pressure (ICP)                                       | 5        |
|                                                               |                                                                                                              |          |
| Face                                                          | Dislocation of teeth                                                                                         | 1        |
| Face                                                          | Fractures of facial bones (single / multiple)                                                                | 2 / 3    |
|                                                               |                                                                                                              |          |
| Neck                                                          | Contusion / blunt trauma                                                                                     | 1        |
| Neck                                                          | Cervical fracture without cord damage                                                                        | 3        |
| Neck                                                          | Cervical spine injury with partial paralysis                                                                 | 4        |
| Neck                                                          | Cervical spine injury with quadriplegia                                                                      | 5        |
|                                                               |                                                                                                              |          |
| Thorax                                                        | Contusion / blunt trauma                                                                                     | 1        |
| Thorax                                                        | Rib fracture (single / multiple)                                                                             | 2 / 3    |
| Thorax                                                        | Bleeding / haemothorax / rupture of diaphragm                                                                | 3        |
| Thorax                                                        | Cardiac arrest                                                                                               | 5        |
|                                                               |                                                                                                              |          |
| Abdomen                                                       | Contusion / blunt trauma                                                                                     | 1        |
| Abdomen                                                       | Kidney haematoma                                                                                             | 2        |
| Abdomen                                                       | Urethral laceration / spleen rupture / bladder injury                                                        | 3        |
| Abdomen                                                       | Bleeding / haematoperitoneum                                                                                 | 4        |
|                                                               |                                                                                                              |          |
| <b>Extremity and pelvis</b>                                   |                                                                                                              |          |
| <b>Fractures</b>                                              |                                                                                                              |          |
| Clavicle / radius / scapula / single digits                   |                                                                                                              | 1        |
| Clavicle + scapula / radius + ulna / tibia + fibula / humerus |                                                                                                              | 2        |
| Femur / Pelvis / multiple fractures                           |                                                                                                              | 3        |
| Multiple long-bone (e.g. both legs)                           |                                                                                                              | 4        |
| <b>Dislocations</b>                                           |                                                                                                              |          |
| Elbow / digits                                                |                                                                                                              | 1        |
| Shoulder / knee                                               |                                                                                                              | 2        |
| Pelvis / femur                                                |                                                                                                              | 3        |
| Laceration of major nerves / vessels of extremities           |                                                                                                              | 3        |
| Amputation of limbs                                           |                                                                                                              | 4        |
| Multiple open limb fractures                                  |                                                                                                              | 5        |

|                 |                                                              |   |
|-----------------|--------------------------------------------------------------|---|
| <b>External</b> |                                                              |   |
| <b>All</b>      | Superficial wound / abrasion                                 | 1 |
| <b>All</b>      | Open / deeper wound / laceration / open fracture             | 2 |
| <b>All</b>      | Multiple deep open wounds ( $\geq 3$ ) / "de-gloving" wounds | 3 |
| <b>All</b>      | Severe lacerations with dangerous haemorrhage                | 4 |
| <b>All</b>      | Burns 1°                                                     | 1 |
| <b>All</b>      | Burns 2°/3° involving 10-20% BSA                             | 2 |

Table S2: Descriptive analysis

| Variables                                            | Levels and values calculated | Descriptive statistics |      |                  |      |          |      |                                            |
|------------------------------------------------------|------------------------------|------------------------|------|------------------|------|----------|------|--------------------------------------------|
| Demographic data                                     |                              |                        |      |                  |      |          |      |                                            |
|                                                      |                              | Urban Hospital 1       |      | Rural Hospital 2 |      | combined |      | Significance<br>(p; <i>test utilized</i> ) |
| <b>AGE</b><br><br>(Continuous / ordered categorical) | Mean [Years]                 | 29.21                  |      | 31.68            |      | 30.67    |      | <i>Mann-Whitney</i>                        |
|                                                      | Mean for no-RTC              | 26.93                  |      | 31.29            |      | 29.59    |      | <b>0.018</b>                               |
|                                                      | Mean for RTC                 | 30.83                  |      | 32.0             |      | 31.50    |      | <b>0.004</b>                               |
|                                                      | Age groups [n / %]           |                        |      |                  |      |          |      | 0.499                                      |
|                                                      | 0 – 4                        | 54                     | 7.8  | 44               | 4.4  | 98       | 5.8  | <i>Chi-squared:</i>                        |
|                                                      | 5 – 14                       | 70                     | 10.2 | 97               | 9.7  | 167      | 9.9  | <b>0.003</b>                               |
|                                                      | 15 – 24                      | 150                    | 21.8 | 215              | 21.6 | 365      | 21.7 | 0.774                                      |
|                                                      | 25 – 34                      | 208                    | 30.2 | 304              | 30.6 | 512      | 30.4 | 0.924                                      |
|                                                      | 35 – 44                      | 94                     | 13.7 | 136              | 13.7 | 230      | 13.7 | 0.888                                      |
|                                                      | 45 – 54                      | 56                     | 8.1  | 88               | 8.8  | 144      | 8.6  | 0.997                                      |
|                                                      | 55 – 64                      | 25                     | 3.6  | 39               | 3.9  | 64       | 3.8  | 0.611                                      |
|                                                      | > 65                         | 31                     | 4.1  | 72               | 7.2  | 103      | 6.1  | 0.763                                      |
| <b>GENDER</b><br><br>(Categorical, nominal)          | <b>all trauma</b>            |                        |      |                  |      |          |      | <i>Chi-squared:</i>                        |
|                                                      | n / % Male                   | 500                    | 72.7 | 746              | 75.0 | 1,246    | 74.0 | 0.290                                      |
|                                                      | n / % Female                 | 188                    | 27.3 | 249              | 25.0 | 437      | 26.0 |                                            |
|                                                      | <b>RTC</b>                   |                        |      |                  |      |          |      | <i>Chi-squared:</i>                        |
|                                                      | n / % Male                   | 278                    | 69.0 | 407              | 74.3 | 685      | 72.0 | 0.073                                      |
|                                                      | n / % Female                 | 125                    | 31.0 | 141              | 25.7 | 266      | 28.0 |                                            |
|                                                      | <b>no-RTC</b>                |                        |      |                  |      |          |      | <i>Chi-squared:</i>                        |
|                                                      | n / % Male                   | 222                    | 77.9 | 339              | 75.8 | 561      | 76.6 | 0.522                                      |
|                                                      | n / % Female                 | 63                     | 22.1 | 108              | 24.2 | 171      | 23.4 |                                            |
| Hospital admission data                              |                              |                        |      |                  |      |          |      |                                            |
|                                                      |                              | Urban Hospital 1       |      | Rural Hospital 2 |      | combined |      | Significance<br>(p; <i>test utilized</i> ) |
| <b>HOSPITAL</b>                                      | Total                        | 5,018                  |      | 9,735            |      | 14,753   |      |                                            |

| ADMISSIONS DURING STUDY PERIOD                 |     | Prevalence trauma                            | 688                       | 13.7 | 995                       | 10.2 | 1,683                                    | 11.4 | <i>Chi-squared:</i><br>0.154               |
|------------------------------------------------|-----|----------------------------------------------|---------------------------|------|---------------------------|------|------------------------------------------|------|--------------------------------------------|
| (w/o maternity ward)<br>(Categorical, ordinal) |     | Prevalence of RTC from total Admissions      | 403                       | 8.0  | 548                       | 5.6  | 951                                      | 6.4  |                                            |
|                                                |     | Prevalence of RTC from all trauma admissions | 58.6%                     |      | 55.1%                     |      | 56.5%                                    |      |                                            |
| TRAUMA MORTALITY                               |     | no-RTC                                       | 20 no-RTC trauma          | 7.0  | 13 no-RTC cases           | 2.9  | 33 no-RTC cases                          | 4.5  | <i>Chi-squared:</i><br><b>0.009</b>        |
|                                                |     | RTC                                          | 17 RTC trauma             | 4.0  | 17 RTC cases              | 3.1  | 34 RTC cases                             | 3.6  | 0.360                                      |
|                                                |     | Total number of fatal cases                  | 37 of all trauma cases    | 5.4  | 30 of all trauma cases    | 3.0  | 67 of all trauma cases                   | 4.0  | <b>0.015</b>                               |
| DURATION OF HOSPITAL STAY                      |     | all trauma [days]                            | Mean: 5.0<br>Median: 3.0  |      | Mean: 7.1<br>Median: 4.0  |      | Mean: 6.3<br>Median: 4.0                 |      | <i>Mann-Whitney U</i><br><b>&lt; 0.001</b> |
|                                                |     | Short (0-3 days)                             | 353                       | 51.3 | 435                       | 43.7 | 788                                      | 46.8 | <i>Kruskal-Wallis</i><br><b>&lt; 0.001</b> |
|                                                |     | Moderate (4-9 days)                          | 262                       | 38.1 | 379                       | 38.1 | 641                                      | 38.1 |                                            |
|                                                |     | Long (> 10 days)                             | 73                        | 10.6 | 181                       | 18.2 | 254                                      | 15.1 |                                            |
|                                                |     | RTC [days]                                   | Mean: 4.92<br>Median: 3.0 |      | Mean: 7.9<br>Median: 5.0  |      | Mean: 6.7<br>Median: 4.0                 |      | <i>Mann-Whitney U</i><br><b>&lt; 0.001</b> |
|                                                |     | Short (0-3 days)                             | 207                       | 51.4 | 215                       | 39.2 | 422                                      | 44.4 | <i>Kruskal-Wallis</i><br><b>&lt; 0.001</b> |
| Moderate (4-9 days)                            | 153 | 38.0                                         | 218                       | 39.8 | 371                       | 39.0 |                                          |      |                                            |
| Long (> 10 days)                               | 43  | 10.7                                         | 115                       | 21.0 | 158                       | 16.6 |                                          |      |                                            |
|                                                |     | no-RTC [days]                                | Mean: 5.13<br>Median: 3.0 |      | Mean: 6.11<br>Median: 4.0 |      | Mean: 5.73<br>Median: 3.50               |      | <i>Mann-Whitney U</i><br>0.681             |
|                                                |     | Short (0-3 days)                             | 146                       | 51.2 | 220                       | 49.2 | 366 / 50.0%<br>270 / 36.9%<br>96 / 13.1% |      | <i>Kruskal-Wallis</i><br>0.330             |
|                                                |     | Moderate (4-9 days)                          | 109                       | 38.2 | 161                       | 36.0 |                                          |      |                                            |
|                                                |     | Long (> 10 days)                             | 30                        | 10.5 | 66                        | 14.8 |                                          |      |                                            |
| RTC characteristics                            |     |                                              |                           |      |                           |      |                                          |      |                                            |

|                                                    |                         | Urban Hospital 1            | Rural Hospital 2         | combined                 | Significance<br>(p; <i>test utilized</i> )   |
|----------------------------------------------------|-------------------------|-----------------------------|--------------------------|--------------------------|----------------------------------------------|
|                                                    |                         |                             |                          |                          | <u>Chi-squared:</u>                          |
| <b>MODE OF TRANSPORT</b><br>(Categorical, ordinal) | Pedestrian              | 139 / 37.2%                 | 84 / 29.3%               | 223 / 33.7%              | <b>p = 0.033</b>                             |
|                                                    | Bicycle                 | 8 / 2.1%                    | 10 / 3.5%                | 18 / 2.7%                | p = 0.292                                    |
|                                                    | Motorcycle              | 171 / 45.7%                 | 157 / 54.7%              | 328 / 49.6%              | <b>p = 0.022</b>                             |
|                                                    | Car (including vans)    | 38 / 10.2%                  | 26 / 9.1%                | 64 / 9.7%                | p = 0.635                                    |
|                                                    | Heavy transport vehicle | 13 / 3.5%                   | 6 / 2.1%                 | 19 / 2.9%                | p = 0.291                                    |
|                                                    | Bus                     | 5 / 1.3%                    | 4 / 1.4%                 | 9 / 1.4%                 | p = 0.950                                    |
|                                                    | Others / unknown*       | 29 / 403 (7.2%)             | 261 / 548 (47.6%)        | 290 / 951 (30.5%)        |                                              |
| <b>ROAD USER</b><br>(Categorical, ordinal)         |                         |                             |                          |                          | Chi-squared<br>Test:<br>(others<br>excluded) |
|                                                    | Pedestrian              | 139 / 38%                   | 84 / 35.5%               | 223 / 35.5%              | p = 0.118                                    |
|                                                    | Driver                  | 102 / 27.9%                 | 58 / 22.1%               | 160 / 25.4%              | p = 0.099                                    |
|                                                    | Passenger               | 125 / 34.2%                 | 121 / 46.0%              | 246 / 39.1%              | <b>p = 0.003</b>                             |
|                                                    | Unknown                 | 37 / 403<br>(9.2%)          | 285 / 548<br>(52%)       | 322 / 951<br>(33.9%)     |                                              |
|                                                    |                         |                             |                          |                          | Chi-squared<br>Test:<br>(others<br>excluded) |
| <b>Crash COUNTERPART</b><br>(Categorical, ordinal) | Pedestrian              | 7 / 2.7%                    | 1 / 0.7%                 | 8 / 1.9%                 | p = 0.147                                    |
|                                                    | Bicycle                 | 5 / 1.9%                    | 3 / 2.0%                 | 8 / 1.9%                 | p = 0.979                                    |
|                                                    | Motorcycle              | 81 / 31.2%                  | 92 / 60.1%               | 173 / 41.9%              | <b>p &lt; 0.001</b>                          |
|                                                    | Car (including vans)    | 147 / 56.5%%                | 52 / 34.0%               | 199 / 48.2%              | <b>p &lt; 0.001</b>                          |
|                                                    | Heavy transport vehicle | 16 / 6.2%                   | 5 / 3.3%                 | 21 / 5.1%                | p = 0.197                                    |
|                                                    | Bus                     | 4 / 1.5%                    | 0 / 0%                   | 4 / 1.0%                 | p = 0.123                                    |
|                                                    | Others / unknown*       | 143 / 403 (35.5%)           | 395 / 548 (72.1%)        | 538 / 951 (56.6%)        |                                              |
| <b>Injury characteristics</b>                      |                         |                             |                          |                          |                                              |
|                                                    |                         | Urban Hospital 1            | Rural Hospital 2         | combined                 | Significance<br>(p; <i>test utilized</i> )   |
| <b>INJURY SEVERITY<br/>SCORE (ISS)</b>             |                         | Mean: 13.79<br>Median: 10.0 | Mean: 7.1<br>Median: 5.0 | Mean: 9.9<br>Median: 8.0 | <u>Mann-Whitney U</u><br><b>p &lt; 0.001</b> |

|                                                      |                                                                                    |                                                       |                                                     |                                                        |                                            |
|------------------------------------------------------|------------------------------------------------------------------------------------|-------------------------------------------------------|-----------------------------------------------------|--------------------------------------------------------|--------------------------------------------|
| (Continuous / ordered categorical)                   | Mild (ISS < 9)<br>Moderate (ISS 9-15)<br>Severe (ISS 16-25)<br>Profound (ISS > 25) | 163 / 40.4%<br>79 / 19.6%<br>98 / 24.3%<br>63 / 15.6% | 358 / 65.4%<br>142 / 26.0%<br>41 / 7.5%<br>6 / 1.1% | 521 / 54.8%<br>221 / 23.3%<br>129 / 14.6%<br>69 / 7.3% | Kruskal-Wallis Test<br><b>p &lt; 0.001</b> |
| <b>INJURY LOCATION</b><br><br>(Categorical, ordinal) | Head                                                                               | 259 / 64.3%                                           | 140 / 25.5%                                         | 399 / 42.0%                                            | <u>Chi-squared:</u><br><b>p &lt; 0.001</b> |
|                                                      | Face                                                                               | 111 / 27.5%                                           | 142 / 25.9%                                         | 253 / 26.6%                                            | p = 0.558                                  |
|                                                      | Neck                                                                               | 0 / 0%                                                | 2 / 0.4%                                            | 2 / 0.2%                                               | p = 0.225                                  |
|                                                      | Spine                                                                              | 13 / 3.2%                                             | 6 / 1.1%                                            | 19 / 2.0%                                              | <b>p = 0.020</b>                           |
|                                                      | Head/face/neck/spine (combined)                                                    | 284 / 70.5%                                           | 239 / 43.6%                                         | 523 / 55.0%                                            | <b>p &lt; 0.001</b>                        |
|                                                      | Thorax                                                                             | 56 / 13.9%                                            | 45 / 8.2%                                           | 101 / 10.6%                                            | <b>p = 0.005</b>                           |
|                                                      | Abdomen                                                                            | 31 / 7.7%                                             | 13 / 2.4%                                           | 44 / 4.6%                                              | <b>p &lt; 0.001</b>                        |
|                                                      | Thorax / Abdomen (combined)                                                        | 77 / 19.1%                                            | 58 / 10.6%                                          | 135 / 14.2%                                            | <b>p &lt; 0.001</b>                        |
|                                                      | Shoulder / upper arm                                                               | 68 / 16.9%                                            | 76 / 13.9%                                          | 144 / 15.1%                                            | p = 0.201                                  |
|                                                      | Elbow / lower arm                                                                  | 27 / 6.7%                                             | 56 / 10.2%                                          | 83 / 8.7%                                              | p = 0.057                                  |
|                                                      | Hand wrist / hand                                                                  | 21 / 5.2%                                             | 17 / 3.1%                                           | 38 / 4.0%                                              | p = 0.101                                  |
|                                                      | upper extremity (combined)                                                         | 104 / 25.8%                                           | 139 / 25.4%                                         | 243 / 25.6%                                            | p = 0.877                                  |
|                                                      | Hip / femur                                                                        | 65 / 16.1%                                            | 128 / 23.4%                                         | 193 / 20.3%                                            | <b>p = 0.006</b>                           |
|                                                      | Knee / lower leg                                                                   | 74 / 18.4%                                            | 175 / 31.9%                                         | 249 / 26.2%                                            | <b>p &lt; 0.001</b>                        |
|                                                      | Ankle / foot                                                                       | 26 / 6.5%                                             | 39 / 7.1%                                           | 65 / 6.8%                                              | p = 0.688                                  |
|                                                      | lower extremity (combined)                                                         | 129 / 32.0%                                           | 293 / 53.5%                                         | 422 / 44.4%                                            | <b>p &lt; 0.001</b>                        |
|                                                      | all extremities (combined)                                                         | 197 / 48.9%                                           | 389 / 71.0%                                         | 586 / 61.6%                                            | <b>p &lt; 0.001</b>                        |
|                                                      | Others / not classified                                                            | 57 / 14.1%                                            | 48 / 8.8%                                           | 105 / 11.0 %                                           | (p = 0.01)                                 |
| <b>MULTIPLE INJURY LOCATIONS</b>                     | 1                                                                                  | 147 / 36.5%                                           | 298 / 54.4%                                         | 445 / 46.8%                                            | <u>Chi-squared</u><br><b>p &lt; 0.001</b>  |
|                                                      | 2                                                                                  | 148 / 36.7%                                           | 174 / 31.8%                                         | 322 / 33.9%                                            | p = 0.109                                  |
|                                                      | 3                                                                                  | 78 / 19.4%                                            | 65 / 11.9%                                          | 143 / 15.0%                                            | <b>p = 0.001</b>                           |
|                                                      | 4                                                                                  | 22 / 5.5%                                             | 9 / 1.6%                                            | 31 / 3.3%                                              | <b>p = 0.001</b>                           |
|                                                      | 5                                                                                  | 5 / 1.2%                                              | 2 / 0.4%                                            | 7 / 0.7%                                               | p = 0.118                                  |
|                                                      | 6                                                                                  | 3 / 0.7%                                              | 0 / 0%                                              | 3 / 0.3%                                               | <b>p = 0.043</b>                           |
| <b>INJURY TYPE</b>                                   |                                                                                    |                                                       |                                                     |                                                        | <u>Chi-squared</u>                         |

|                                 |                                            |              |             |             |                     |
|---------------------------------|--------------------------------------------|--------------|-------------|-------------|---------------------|
| (Categorical, ordinal)          | Superficial wound (e.g. abrasion)          | 142 / 35.2%  | 181 / 33.0% | 323 / 34.0% | p = 0.478           |
|                                 | Open (deeper) wound (e.g. laceration)      | 124 / 30.8%% | 229 / 41.8% | 353 / 37.1% | <b>p = 0.001</b>    |
|                                 | STI (TOTAL)                                | 232 / 57.6%  | 373 / 68.1% | 605 / 63.6% | <b>p = 0.001</b>    |
|                                 | Fracture (closed)                          | 17 / 4.2%    | 52 / 9.5%   | 69 / 7.3%   | <b>p = 0.002</b>    |
|                                 | Fracture (open)                            | 23 / 5.7%    | 71 / 13.0%  | 94 / 9.9%   | <b>p &lt; 0.001</b> |
|                                 | Fracture (not classified)                  | 222 / 55.1%  | 201 / 36.7% | 423 / 44.5% | <b>p &lt; 0.001</b> |
|                                 | Fractures (TOTAL)                          | 249 / 61.8%  | 308 / 56.2% | 557 / 58.6% | p = 0.084           |
|                                 | Fractures (TOTAL without head)             | 186 / 46.2%  | 300 / 54.7% | 486 / 51.1% | <b>p = 0.009</b>    |
|                                 | Fractures (only head)                      | 88 / 21.8%   | 10 / 1.8%   | 98 / 10.3%  | <b>p &lt; 0.001</b> |
|                                 | Fractures upper leg                        | 45 / 11.2%   | 107 / 19.5% | 152 / 16.0% | <b>p = 0.001</b>    |
|                                 | Fractures lower leg                        | 62 / 15.4%   | 126 / 23.0% | 188 / 19.8% | <b>p = 0.004</b>    |
|                                 | Luxation / sprain / strain                 | 18 / 4.5%    | 29 / 5.3%   | 47 / 4.9%   | p = 0.562           |
|                                 | Contusion / blunt trauma                   | 296 / 73.4%  | 139 / 25.4% | 435 / 45.7% | <b>p &lt; 0.001</b> |
|                                 | bleeding / raised intracranial pressure    | 135 / 33.5%  | 10 / 1.8%   | 145 / 15.2% | <b>p &lt; 0.001</b> |
|                                 | Others / not classified                    | 0 / 0%       | 1 / 0.2%    | 1 / 0.1%    | p = 0.391           |
| <b><u>MULTIPLE INJURIES</u></b> | Number of all injuries in one patient      |              |             |             | Chi-squared         |
|                                 | 1                                          | 55 / 13.6%   | 217 / 39.6% | 272 / 28.6% | <b>p &lt; 0.001</b> |
|                                 | 2                                          | 121 / 30.0%  | 192 / 35.0% | 313 / 32.9% | p = 0.104           |
|                                 | 3                                          | 114 / 28.3%  | 102 / 18.6% | 216 / 22.7% | <b>p &lt; 0.001</b> |
|                                 | 4                                          | 62 / 15.4%   | 28 / 5.1%   | 90 / 9.5%   | <b>p &lt; 0.001</b> |
|                                 | 5                                          | 30 / 7.4%    | 6 / 1.1%    | 36 / 3.8%   | <b>p &lt; 0.001</b> |
|                                 | 6                                          | 15 / 3.7%    | 3 / 0.5     | 18 / 1.9%   | <b>p &lt; 0.001</b> |
|                                 | 7                                          | 3 / 0.7%     | 0 / 0%      | 3 / 0.3%    | <b>p = 0.043</b>    |
|                                 | 8                                          | 2 / 0.5%     | 0 / 0%      | 2 / 0.2%    | p = 0.099           |
|                                 | 9                                          | 1 / 0.2%     | 0 / 0%      | 1 / 0.1%    | p = 0.243           |
|                                 | Number of fractures in one patient (total) |              |             |             | Chi-squared         |
|                                 | 0                                          | 154 / 38.2%  | 240 / 43.8% | 394 / 41.4% | p = 0.084           |
|                                 | 1                                          | 179 / 44.4%  | 267 / 48.7% | 446 / 46.9% | p = 0.189           |
|                                 | 2                                          | 59 / 14.6%   | 38 / 6.9%   | 97 / 10.2%  | <b>p &lt; 0.001</b> |
|                                 | 3                                          | 11 / 2.7%    | 3 / 0.5%    | 14 / 1.5%   | <b>p = 0.006</b>    |



|  |                                                   |             |             |             |                                  |
|--|---------------------------------------------------|-------------|-------------|-------------|----------------------------------|
|  | Number of fractures in one patient (without head) |             |             |             | Chi-squared:<br><b>p = 0.009</b> |
|  | 0                                                 | 217 / 53.8% | 248 / 45.3% | 465 / 48.9% | <b>p &lt; 0.001</b>              |
|  | 1                                                 | 136 / 33.7% | 260 / 47.4% | 396 / 41.6% | <b>p = 0.031</b>                 |
|  | 2                                                 | 44 / 10.9%  | 38 / 6.9%   | 82 / 8.6%   | p = 0.061                        |
|  | 3                                                 | 6 / 1.5%    | 2 / 0.4%    | 8 / 0.8%    |                                  |
|  | Number of STI in one patient                      |             |             |             | Chi-squared                      |
|  | 0                                                 | 171 / 42.4% | 175 / 31.9% | 346 / 36.4% | <b>p = 0.001</b>                 |
|  | 1                                                 | 153 / 38.0% | 253 / 46.2% | 406 / 42.7% | <b>p = 0.012</b>                 |
|  | 2                                                 | 53 / 13.2%  | 92 / 16.8%  | 145 / 15.2% | p = 0.123                        |
|  | 3                                                 | 22 / 5.5%   | 25 / 4.6%   | 47 / 4.9%   | p = 0.528                        |
|  | 4                                                 | 3 / 0.7%    | 3 / 0.5%    | 6 / 0.6%    | p = 0.705                        |
|  | 5                                                 | 1 / 0.2%    | 0 / 0%      | 1 / 0.1%    | p = 0.243                        |
